# Supplementary material
Source: PubMed Central journal article supplement (PMC3335456)
Supplement: brc-0007-0048-s01.pdf [file brc-0007-0048-s01.pdf]

## Excision of Nonpalpable Breast Cancer with Indocyanine Green Fluorescence-Guided Occult Lesion Localization (IFOLL)

Fatih Aydogan<sup>a</sup> Volkan Ozben<sup>b</sup> Erman Aytac<sup>a</sup> Halit Yilmaz<sup>c</sup> Ali Cercel<sup>a</sup> Varol Celik<sup>a</sup>

<sup>a</sup>Department of General Surgery, Istanbul University Cerrahpasa Medical School, Istanbul

<sup>b</sup>General Surgery Clinic, Surmene State Hospital, Surmene, Trabzon,

<sup>c</sup>Department of Radiology, Istanbul University Cerrahpasa Medical School, Istanbul, Turkey

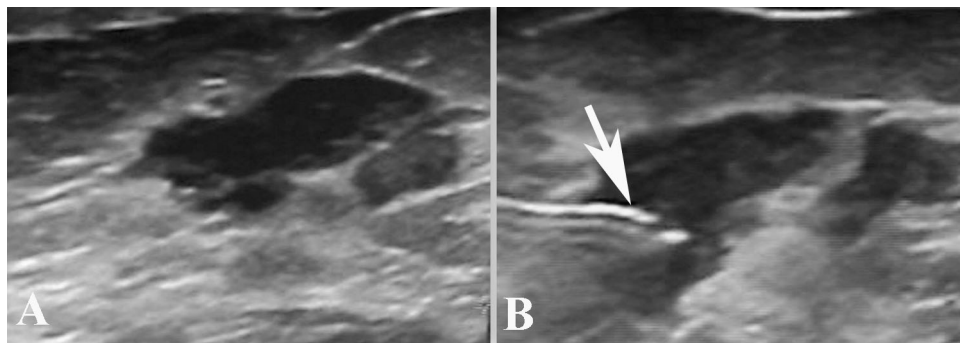

**Fig. 1.** Ultrasonographic appearance of a nonpalpable breast lesion: **A** hypoechoic mass with irregular margins; **B** intralesional injection of indocyanine green (ICG) solution with a spinal needle under ultrasound guidance (arrow).

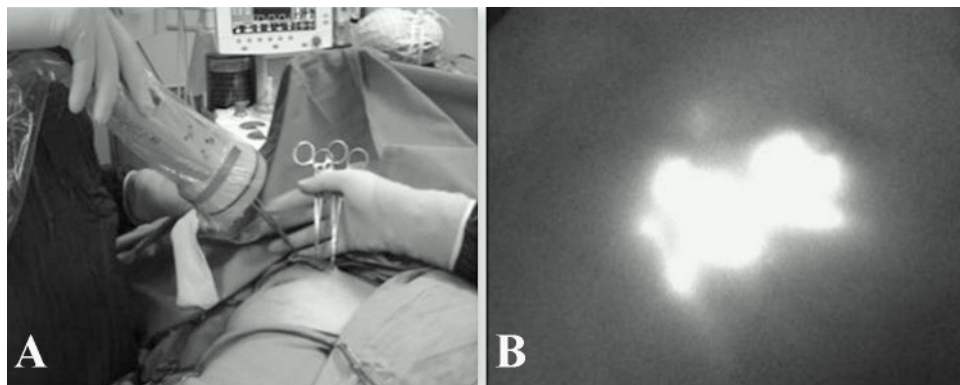

**Fig. 2.** **A** During surgery, a near-infrared-sensitive imaging system was used to observe **B** the area of indocyanine green (ICG)-derived fluorescence.

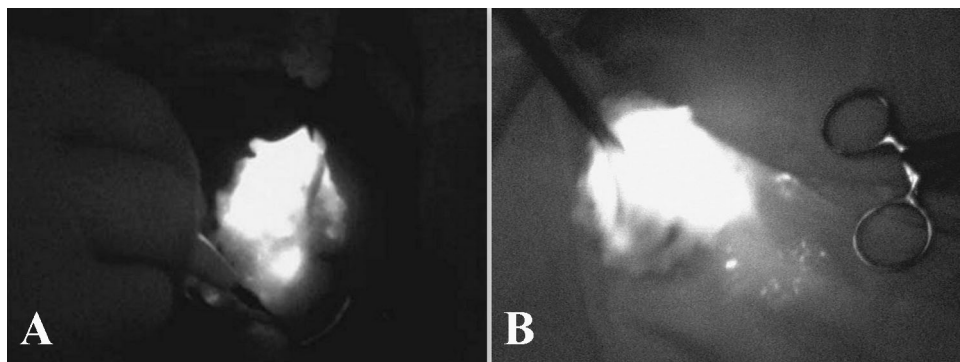

**Fig. 3.** **A** The resection margins were defined under the guidance of fluorescence imaging; **B** appearance of the specimen after excision.
